# Supplementary material for: Zero-dimensional ionic antimony halide inorganic–organic hybrid with strong greenish yellow emission
Source: Royal Society of Chemistry journal article supplement (doi:10.1039/c9tc05868k), 2020-01-01
Supplement: c9tc05868k1.pdf [file c9tc05868k1.pdf]

## Supporting information

### Zero-dimensional ionic antimony halide inorganic-organic hybrid with strong greenish yellow emission

Fang Lin,<sup>a</sup> Hao Wang,<sup>a</sup> Wei Liu<sup>\*a</sup> and Jing Li<sup>\*b,a</sup>

<sup>a</sup> Hoffmann Institute of Advanced Materials, Shenzhen Polytechnic, 7098 Liuxian Blvd, Nanshan District, Shenzhen, 518055, China

<sup>b</sup> Department of Chemistry and Chemical Biology, Rutgers University, 123 Bevier Road, Piscataway, NJ, 08854, USA

#### Materials and Characterization

**Materials.** SbBr<sub>3</sub> (99.9% metals basis) were purchased from Alfa Aesar, 1-carboxymethyl-3-methylimidazolium chloride (98%) were purchased from Merck, acetonitrile (>99%), ethylacetate (EA, AR,99% ) were purchased from Aladdin. All reagents and solvents were used without further purification unless otherwise stated.

**Synthesis of 1.** A mixture of SbBr<sub>3</sub> (0.0361 g, 0.1 mmol), 1-carboxymethyl-3-methylimidazolium chloride (0.0354 g, 0.2 mmol) in acetonitrile (6mL) and ethylacetate (2 mL) was stirred in 20mL glass bottle for 1 hour to form a white precipitate, and then sealed in a Teflon-lined bomb and heated to a temperature of 120°C for 3 days, then cooled slowly to room temperature. Colorless crystals and white polycrystalline powder were slowly precipitated out from the solution.

**Sample Washing and Drying.** Upon completion of reactions, powder sample of **1** was collected by filtration from the reaction solution and washed with a small amount of acetonitrile for three times. The sample was then dried in a vacuum oven overnight before other measurements were made.

**Single crystal X-ray diffraction (SXRD).** Single crystal X-ray diffraction data were collected at 225K on a Bruker D8 Venture diffractometer with graphite-monochromated Ga K $\alpha$  radiation ( $\lambda = 1.34139 \text{ \AA}$ ) The structures were solved by direct methods and refined by full-matrix least-squares on F<sub>2</sub> using the Bruker SHELXTL package.<sup>1</sup> These data can be obtained free of charge from The Cambridge Crystallographic Data Centre via [www.ccdc.cam.ac.uk/data\\_request/cif](http://www.ccdc.cam.ac.uk/data_request/cif). The structures were deposited in Cambridge Structural Database (CSD) and the number is 1998894.

**Powder X-ray diffraction (PXRD).** PXRD analyses were carried out on a Bruker D8 Advance automated diffraction system using Cu K $\alpha$  radiation ( $\lambda=1.5406 \text{ \AA}$ ). The data were collected at room temperature in a 2 $\theta$  range of 3–50° with a scan speed of 1°/min.

The operating power was 40 kV/40 mA.

**Optical diffuse reflectance measurements.** Optical diffuse reflectance spectra were measured at room temperature on a Shimadzu UV-3600 spectrophotometer. Data were collected in the wavelength range of 300-1200 nm. BaSO<sub>4</sub> powder was used as a standard (100% reflectance). A similar procedure as previously described was used to collect and convert the data using the Kubelka-Munk function. The scattering coefficient (S) was treated as a constant since the average particle size of the samples used in the measurements was significantly larger than 5 μm.

**Thermogravimetric (TG) analysis.** TG analyses of the title compounds were performed on a computer-controlled TG 550 (TA Instrument). Pure powder samples were loaded into platinum pans and heated with a ramp rate of 10 °C/min from room temperature to 700 °C.

**Excitation spectrum measurements.** Excitation spectra were measured at room temperature on a FLS1000 spectrofluorometer (Edinburgh Instruments) monitored at maximum of emission spectra.

**Photoluminescence measurements.** Steady-state photoluminescence spectra were obtained at room temperature and 77 K (liquid nitrogen was used to cool the samples) on a FLS1000 spectrofluorometer.

**Internal quantum yield measurements.** Internal quantum yield (QY) of samples in powder form was measured on a C9920-03 absolute quantum yield measurement system (Hamamatsu Photonics) with a 150 W xenon monochromatic light source and 3.3 inch integrating sphere.

**Time-resolved photoluminescence.** Time-Resolved Emission data were collected at room temperature using the FLS1000 spectrofluorometer. The dynamics of emission decay were monitored by using the FLS1000's time-correlated single-photon counting capability (1024 channels; 10 μs window) with data collection for 10,000 counts. Excitation was provided by an Edinburgh EPL-360 picosecond pulsed diode laser. Long lifetime measurements at 77K (1024 channels; 800 μs window) were collected using Xe flash lamp as the excitation source. The lifetime was obtained by mono-exponential fitting.

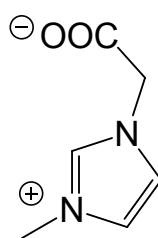

2-(3-methyl-1*H*-imidazol-3-ium-1-yl)acetate

Figure S1. Structural plot of the organic ligand.

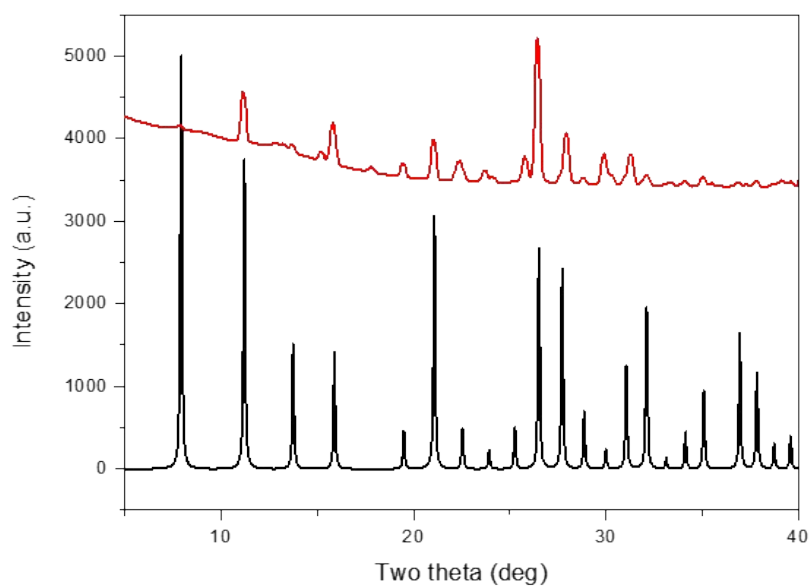

Figure S2. PXRD patterns of as-made (top) and simulated pattern of compound 1 (bottom).

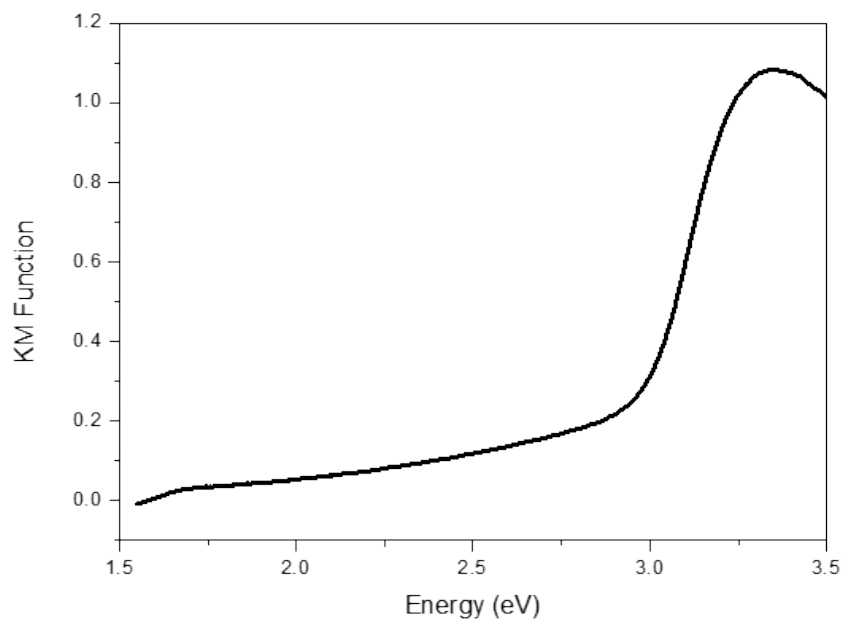

Figure S3. UV plot of compound 1.

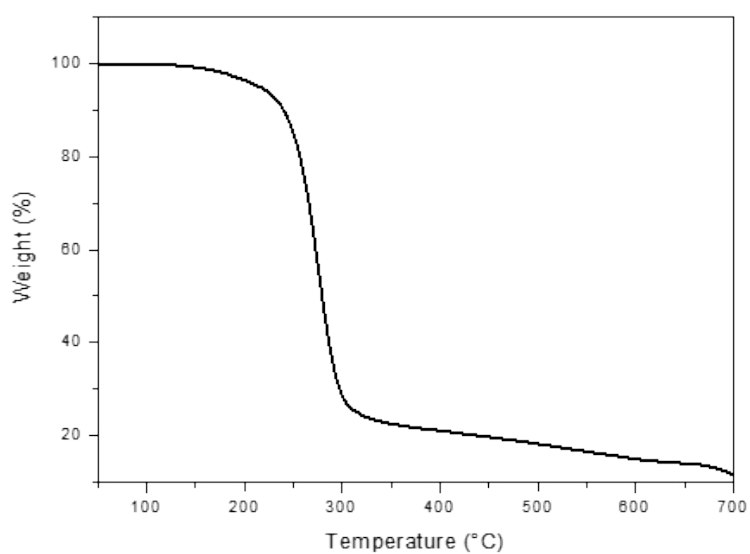

Figure S4. TGA plot of compound **1**.

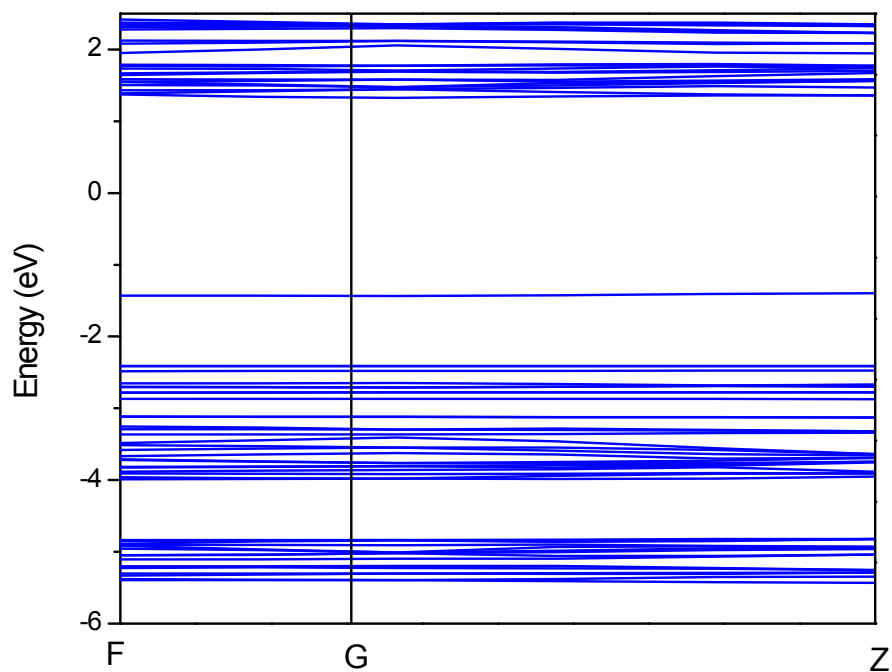

Figure S5. Calculated band structure for **1**.

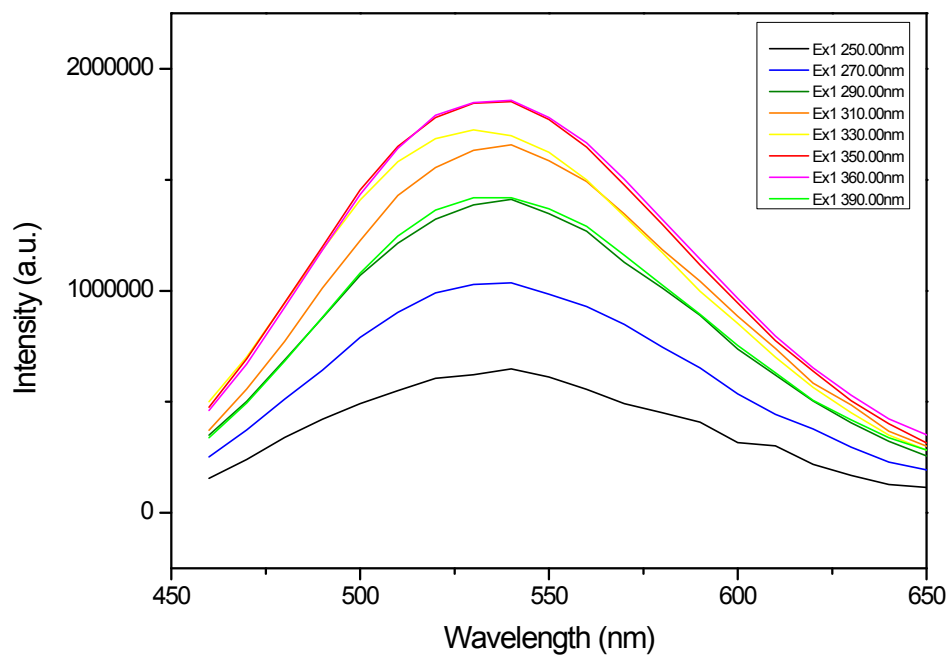

Figure S6. Emission spectra of **1** under various excitation energies.

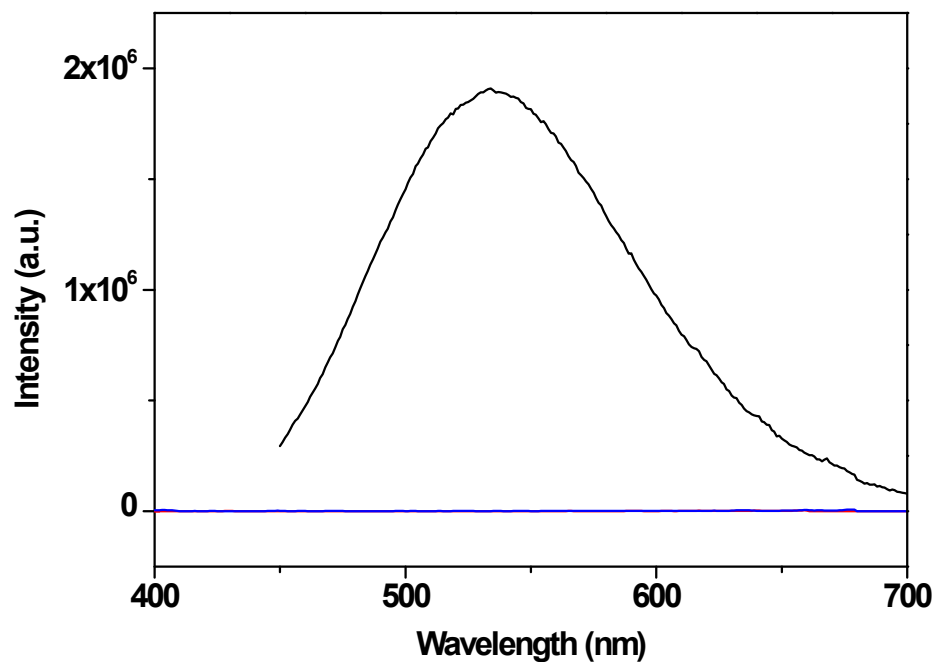

Figure S7. Emission spectra of **1** (black),  $\text{SbBr}_3$  (blue), and the organic ligand (red).  
 $\lambda_{\text{ex}}=360\text{nm}$ .

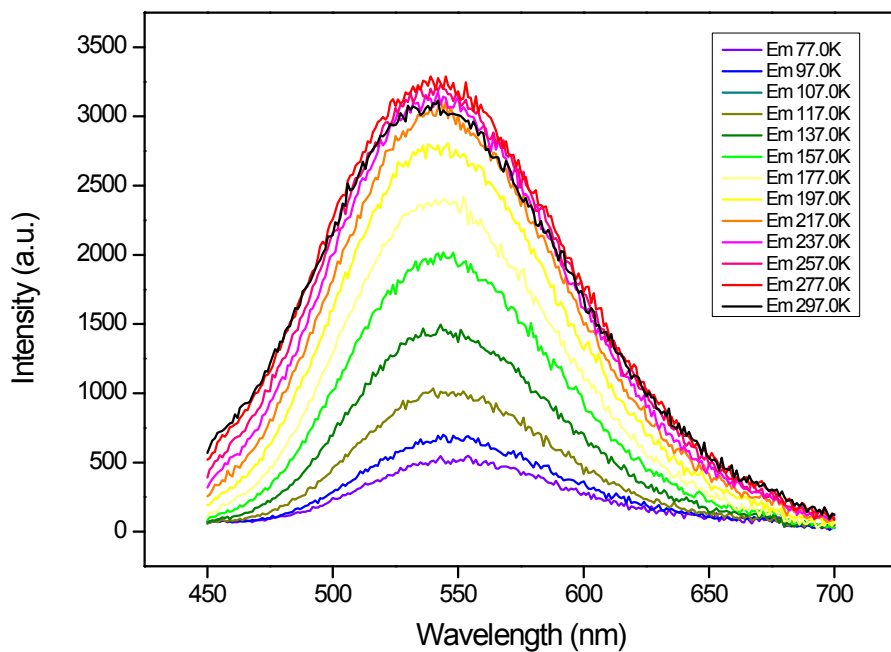

Figure S8. Emission spectra of **1** under various temperatures.  $\lambda_{\text{ex}}=360\text{nm}$ .

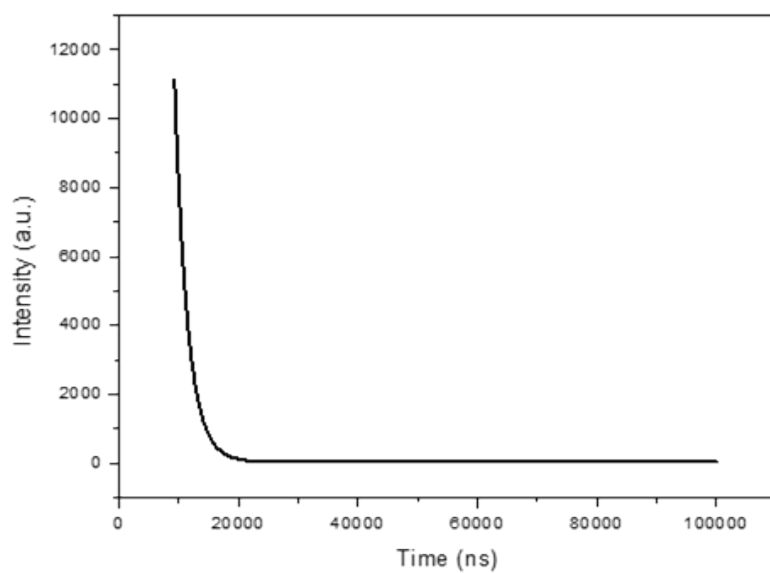

Figure S9. Luminescence decay curve at room temperature of compound **1**.

Table S1. Single crystal X-ray diffraction data of compound **1**

|                                                                  |                                                                                    |
|------------------------------------------------------------------|------------------------------------------------------------------------------------|
| Compound                                                         | H <sub>3</sub> SbBr <sub>6</sub> (L) <sub>6</sub>                                  |
| Formula                                                          | Br <sub>6</sub> C <sub>36</sub> H <sub>51</sub> N <sub>12</sub> O <sub>12</sub> Sb |
| Fw                                                               | 1445.10                                                                            |
| Space Group                                                      | <i>R</i> -3                                                                        |
| <i>a</i> (Å)                                                     | 22.2753(9)                                                                         |
| <i>b</i> (Å)                                                     | 22.2753(9)                                                                         |
| <i>c</i> (Å)                                                     | 8.6405(4)                                                                          |
| $\alpha$ (°)                                                     | 90                                                                                 |
| $\beta$ (°)                                                      | 90                                                                                 |
| $\gamma$ (°)                                                     | 120                                                                                |
| <i>V</i> (Å <sup>3</sup> )                                       | 3712.9(3)                                                                          |
| <i>Z</i>                                                         | 3                                                                                  |
| <i>T</i> (K)                                                     | 225(2)                                                                             |
| $\lambda$ (Å)                                                    | 1.34139                                                                            |
| $\rho$ (g·cm <sup>-3</sup> )                                     | 1.939                                                                              |
| <i>R</i> <sub>1</sub> <sup>a</sup> [ <i>I</i> > 2σ( <i>I</i> )]  | 0.0540                                                                             |
| <i>wR</i> <sub>2</sub> <sup>a</sup> [ <i>I</i> > 2σ( <i>I</i> )] | 0.1649                                                                             |
| <i>R</i> <sub>1</sub> <sup>a</sup> (all data)                    | 0.0542                                                                             |
| <i>wR</i> <sub>2</sub> <sup>a</sup> (all data)                   | 0.1650                                                                             |

$$^a R_1 = \frac{\sum ||F_o| - |F_c||}{\sum |F_o|}, wR_2 = \left[ \frac{\sum w(F_o^2 - F_c^2)^2}{\sum w(F_o^2)^2} \right]^{1/2}.$$

Table S2. Elemental analysis of compound **1**.

| Compound |              | C %  | H % | N %  |
|----------|--------------|------|-----|------|
| <b>1</b> | Calculated   | 29.9 | 3.5 | 11.6 |
|          | Experimental | 29.5 | 3.3 | 11.5 |

Table S3. A summary of recent reported luminescent Sb based hybrid structures

| Compounds                                                                      | $\lambda_{\text{ex}}$<br>(nm) | $\lambda_{\text{em}}$<br>(nm) | Emission color  | IQY(%) |
|--------------------------------------------------------------------------------|-------------------------------|-------------------------------|-----------------|--------|
| [Bmim] <sub>2</sub> SbCl <sub>5</sub> <sup>2</sup>                             | 370                           | 583                           | Yellow          | 86.5   |
| (C <sub>9</sub> NH <sub>20</sub> ) <sub>2</sub> SbCl <sub>5</sub> <sup>3</sup> | 380                           | 590                           | Orange          | 98     |
| [4-methylpiperidinium] <sub>2</sub> SbCl <sub>5</sub> <sup>4</sup>             | 373                           | --                            | White           | 1      |
| (Ph <sub>4</sub> P) <sub>2</sub> SbCl <sub>5</sub> <sup>5</sup>                | 365                           | 648                           | Red             | 87     |
| [Bzmim] <sub>3</sub> SbCl <sub>6</sub> <sup>6</sup>                            | 365                           | 525                           | Green           | 87.5   |
| [Bzmim] <sub>2</sub> SbCl <sub>5</sub> <sup>6</sup>                            | 310                           | 483                           | Blue            | --     |
|                                                                                | 375                           | 600                           | Red             | 22.3   |
| (TTA) <sub>2</sub> SbCl <sub>5</sub> <sup>7</sup>                              | 370                           | 625                           | Red             | 86     |
|                                                                                | 300                           | 465,<br>625                   | White           | 68     |
| (TEBA) <sub>2</sub> SbCl <sub>5</sub> <sup>7</sup>                             | 360                           | 590                           | Yellow          | 98     |
|                                                                                | 300                           | 450,<br>590                   | Yellow          | 72     |
| <b>1</b>                                                                       | 360                           | 530                           | Greenish yellow | 55     |

References:

1. G. M. Sheldrick, *Acta Crystallogr. C Struct. Chem.*, 2015, **71**, 3-8.
2. Z.-P. Wang, J.-Y. Wang, J.-R. Li, M.-L. Feng, G.-D. Zou and X.-Y. Huang, *Chem. Commun.*, 2015, **51**, 3094-3097.
3. C. Xi, Q. Chengjun, D. Wei, L. Jingwen, M. Xiaoming, Z. Yulu, L. Tao, T. Xiaoma, C. Hongmei and O. Yifang, *J. Phys. D: Appl. Phys.*, 2018, **51**, 405103.
4. A. Khan, A. Zeb, L. Li, W. Zhang, Z. Sun, Y. Wang and J. Luo, *J. Mater. Chem. C*, 2018, **6**, 2801-2805.
5. C. Zhou, M. Worku, J. Neu, H. Lin, Y. Tian, S. Lee, Y. Zhou, D. Han, S. Chen, A. Hao, P. I. Djurovich, T. Siegrist, M.-H. Du and B. Ma, *Chem. Mater.*, 2018, **30**, 2374-2378.
6. Z. Wang, Z. Zhang, L. Tao, N. Shen, B. Hu, L. Gong, J. Li, X. Chen and X. Huang, 2019, **58**, 9974-



9978.

7. Z. Li, Y. Li, P. Liang, T. Zhou, L. Wang and R.-J. Xie, *Chem. Mater.*, 2019, **31**, 9363-9371.
